# Supplementary material for: Role of aromatic amino acid tryptophan UVA-photoproducts in the determination of drug photosensitization mechanism: a comparison between methylene blue and naproxen
Source: Royal Society of Chemistry journal article supplement (doi:10.1039/b9pp00028c), 2009-08-17
Supplement: b9pp00028c.pdf [file b9pp00028c.pdf]

# **Role of aromatic amino acid tryptophan UVA-photoproducts in the determination of drug photosensitization mechanism: a comparison between methylene blue and naproxen**

Alfio Catalfo, Giuseppina Bracchitta and Guido De Guidi\*

*Dipartimento di Scienze Chimiche*

*Università di Catania, Viale Andrea Doria 6, 95125, Catania, Italy.*

\*Corresponding author: Prof. Guido De Guidi, Dipartimento di Scienze Chimiche, Università di Catania, Viale Andrea Doria 6, 95125, Catania, Italy.

Tel.: +39-095-7385061; fax: +39-095-580138.

E-mail: [gdeguidi@unict.it](mailto:gdeguidi@unict.it)

**Abbreviations.** API-ES, atmospheric pressure ionization-electrospray; Trp, tryptophan; MB, methylene blue; NAP, naproxen; 6-MAN, 6-methoxy-2-acetonaphthone; DAD, photodiode array detector; ECD electrochemical detector; NSAID, non steroidal antiinflammatory drug; MSD, mass spectrometer detector;  $^1\text{O}_2$ , singlet oxygen; PB, phosphate buffer; ROS, reactive oxygen species;.

**Fig. S1** comparison of absorption spectra of PB solutions of 50  $\mu\text{M}$  Trp, 30 $\mu\text{M}$  MB + 50  $\mu\text{M}$  Trp, 300  $\mu\text{M}$  NAP+ 50  $\mu\text{M}$  Trp and emission spectrum of the black phosphor lamp

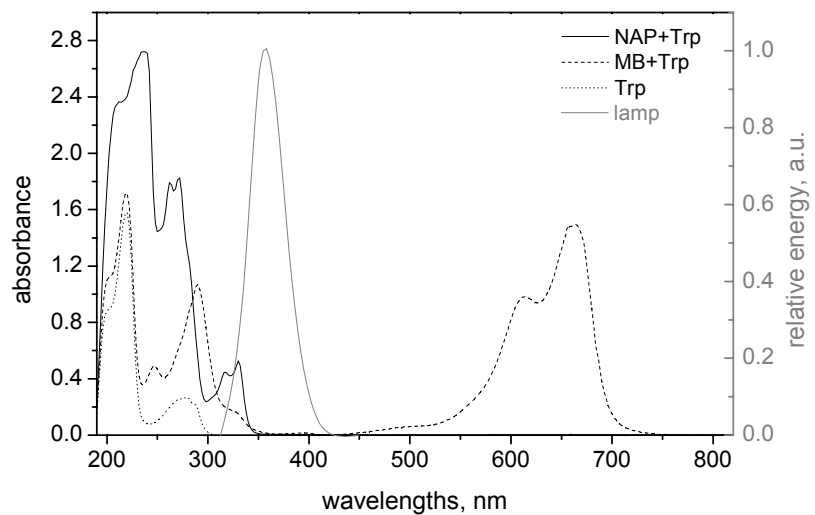

**Figure S1**

|                    | SYSTEM 1                       |                                                               | SYSTEM 2                             |                                           | SYSTEM 3                       |                                                               | SYSTEM 4                  |                                                               | SYSTEM 5            |
|--------------------|--------------------------------|---------------------------------------------------------------|--------------------------------------|-------------------------------------------|--------------------------------|---------------------------------------------------------------|---------------------------|---------------------------------------------------------------|---------------------|
|                    | Isocratic H <sub>2</sub> O/ACN |                                                               | Gradient ACN/pentane-sulfonic buffer |                                           | Isocratic formate buffer/ MeOH |                                                               | Isocratic SOS buffer/MeOH |                                                               | MeOH                |
|                    | t <sub>R</sub>                 | detector                                                      | t <sub>R</sub>                       | detector                                  | t <sub>R</sub>                 | detector                                                      | t <sub>R</sub>            | detector                                                      |                     |
| MB                 |                                |                                                               | 7.9                                  | DAD <sub>280</sub> MSD <sub>320+</sub>    |                                |                                                               |                           |                                                               | MSD <sub>284+</sub> |
| 10-H-phenothiazine | 3.8                            | DAD <sub>280</sub>                                            | 4.2                                  | DAD <sub>280</sub>                        |                                |                                                               |                           |                                                               | MSD <sub>285+</sub> |
| NAP                |                                |                                                               |                                      |                                           | 20                             | DAD <sub>280</sub> FLD <sub>278/356</sub> MSD <sub>231+</sub> |                           |                                                               |                     |
| 6-MAN              | 4.2                            | DAD <sub>280</sub> FLD <sub>278/356</sub> MSD <sub>200+</sub> |                                      |                                           | 22                             | FLD <sub>278/356</sub> DAD <sub>280</sub> MSD <sub>200+</sub> |                           |                                                               |                     |
| NAP alcohol deriv. |                                |                                                               |                                      |                                           | 21                             | FLD <sub>278/356</sub> DAD <sub>280</sub> MSD <sub>198+</sub> |                           |                                                               |                     |
| NAP decarb. deriv. |                                |                                                               |                                      |                                           | 19                             | DAD <sub>330</sub> FLD <sub>330/400</sub> MSD <sub>185+</sub> |                           |                                                               |                     |
| Trp                | 6.5                            | DAD <sub>280</sub> FLD <sub>278/356</sub> MSD <sub>205+</sub> | 5.5                                  | DAD <sub>280</sub> FLD <sub>278/356</sub> | 8.1                            | DAD <sub>280</sub> FLD <sub>278/356</sub> MSD <sub>205+</sub> | 22                        | ECD FLD <sub>278/356</sub> DAD <sub>280</sub>                 |                     |
| 4-OH-chinoline     |                                |                                                               |                                      |                                           | 10                             | DAD <sub>280</sub> FLD <sub>278/356</sub> MSD <sub>146+</sub> |                           |                                                               |                     |
| tryptamine         |                                |                                                               |                                      |                                           | 9.5                            | DAD <sub>280</sub> FLD <sub>278/356</sub> MSD <sub>161+</sub> |                           |                                                               |                     |
| 3-OH-kynurenine    | 3.1                            | DAD <sub>360</sub> FLD <sub>372/425</sub> MSD <sub>225+</sub> |                                      |                                           | 3.8                            | DAD <sub>360</sub> FLD <sub>372/425</sub> MSD <sub>225+</sub> | 3.4                       | DAD <sub>360</sub> ECD                                        |                     |
| kynurenine         | 4.5                            | DAD <sub>360</sub> FLD <sub>360/480</sub> MSD <sub>209+</sub> |                                      |                                           | 5.5                            | DAD <sub>360</sub> FLD <sub>360/480</sub> MSD <sub>209+</sub> | 7.2                       | DAD <sub>360</sub> ECD                                        |                     |
| N-formylkynurenine |                                |                                                               |                                      |                                           | 5.8                            | DAD <sub>330</sub> FLD <sub>325/435</sub> MSD <sub>237+</sub> | 6.5                       | DAD <sub>320</sub> FLD <sub>319/430</sub>                     |                     |
| xanthurenic acid   |                                |                                                               |                                      |                                           |                                |                                                               | 6.1                       | DAD <sub>340</sub> ECD <sub>340/500</sub> MSD <sub>206+</sub> |                     |
| kynurenic acid     |                                |                                                               |                                      |                                           | 8.3                            | DAD <sub>330</sub> FLD <sub>330/375</sub> MSD <sub>190+</sub> |                           |                                                               |                     |
| alanine            |                                |                                                               |                                      |                                           | 2.2                            | MSD <sub>90+</sub>                                            |                           |                                                               |                     |
| serine             |                                |                                                               |                                      |                                           | 2.5                            | MSD <sub>106+</sub>                                           |                           |                                                               |                     |
| aspartic acid      |                                |                                                               |                                      |                                           | 2.8                            | MSD <sub>312+</sub>                                           |                           |                                                               |                     |
| 5-OH-tryptophan    |                                |                                                               |                                      |                                           | 7.2                            | DAD <sub>280</sub> FLD <sub>278/356</sub> MSD <sub>221+</sub> |                           |                                                               |                     |

**Table S1.** HPLC detector setup and retention times

$t_R$ : retention time; DAD<sub>280</sub>: diode array detector at 280 nm; FLD 278/356: fluorescence detector  $\lambda_{ex}/\lambda_{em}$ ; ECD: electrochemical detector; MSD: mass spectrometer; (see also **Experimental Section**)
